# Supplementary material for: Sphingomyelin Synthase 1 Is Essential for Male Fertility in Mice
Source: PLoS One. 2016 Oct 27;11(10):e0164298. doi: 10.1371/journal.pone.0164298 (PMC5082796; doi:10.1371/journal.pone.0164298)
Supplement: S1 Table — Primary and secondary antibodies are listed according to their immunogen. Dilutions of the antibodies are given for Western blotting (WB) and immunohistochemistry (IHC). (XLSX) [file pone.0164298.s003.xlsx]

## Sheet: Sheet1
Primary antybodies
Immunogen	Dilution WB	Dilution ICH	ID	Company
Anit-SMS1 (N-13)	1:1000	1:100	AP05279PU-N	Acris
Anit-SMS2 (E				Santa Cruz
Anti-Occludin	1:500	1:100	ab31721	abcam
Anti-β-Catenin	1:8000	1:500	ab32572	abcam
Anti-Connexin 43	1:8000	1:1000	ab11370	abcam
Anti-phospho-histone H2A.X		1:250	gH2AX; Ser 139; Clone JBW301	Millipore
Anti-Histone 3 tri methyl K9		1:750		abcam
Anit-Histone 3 tri methyl K4		1:150		abcam
HPRT	1:2000		FL-218	Santa Cruz
Secondary antybodies
Immunogen	Dilution WB	Dilution ICH	ID	Company
goat anti-mouse	1:10000			Dianova
goat anti-rabbit	1:10000			Dianova
rabbit anti-goat	1:10000			Dianova
