# Supplementary material for: Sphingomyelin Synthase 1 Is Essential for Male Fertility in Mice
Source: PLoS One. 2016 Oct 27;11(10):e0164298. doi: 10.1371/journal.pone.0164298 (PMC5082796; doi:10.1371/journal.pone.0164298)
Supplement: S3 Table — Levels of Cer species, sorted by intensities, are shown. Data is presented as mean percentage ± SEM, with Sms1WT levels set to 100% (Sms1WT, n = 15; Sms1-/-, n = 17); *p≤0.05, **p≤0.01, ***p≤0.001. (XLSX) [file pone.0164298.s005.xlsx]

## Sheet: Sheet1
	Cer species	wt (15 mice)			SGMS1 -/- (17 mice)			significance
		Intensity	%	SEM %	Intensity	%	SEM %	ttest	significance
	total	6.73973e+06	100	6.74033	6.97834e+06	103.54	3.6718	0.660116
	18:1/16:0	5.66533e+06	100	6.81613	5.8634e+06	103.496	3.76065	0.668325
	18:1/18:1	14660.9	100	5.80165	19713.6	134.463	6.20641	0.000325703	***
	18:1/18:0	153188	100	6.50857	162156	105.854	3.50008	0.451772
	18:1/20:0	49528	100	6.13391	58147.6	117.403	4.4268	0.0321986	*
	18:2/22:0	62331.8	100	6.20357	62268.2	99.8979	5.1473	0.990134
	18:2/23:0	16282.6	100	7.01404	15785.7	96.9478	5.0479	0.732648
	18:1/24:1	766803	100	6.95374	785032	102.377	4.1287	0.778234
	18:1/25:0	6892.33	100	3.53153	7677.91	111.398	5.00598	0.0678621
	18:1/26:1	4721.31	100	7.25199	4165.04	88.2179	6.01779	0.22799
	Cer species	Sms1WT (n=15)			Sms1MUT (n=17)			significance
		Intensity	%	SEM %	Intensity	%	SEM %	ttest	significance
	total	6.73973e+06	100	6.74033	6.97834e+06	103.54	3.6718	0.660116
	18:1/16:0	5.66533e+06	100	6.81613	5.8634e+06	103.496	3.76065	0.668325
	18:1/24:1	766803	100	6.95374	785032	102.377	4.1287	0.778234
	18:1/18:0	153188	100	6.50857	162156	105.854	3.50008	0.451772
	18:2/22:0	62331.8	100	6.20357	62268.2	99.8979	5.1473	0.990134
	18:1/20:0	49528	100	6.13391	58147.6	117.403	4.4268	0.0321986	*
	18:2/23:0	16282.6	100	7.01404	15785.7	96.9478	5.0479	0.732648
	18:1/18:1	14660.9	100	5.80165	19713.6	134.463	6.20641	0.000325703	***
	18:1/25:0	6892.33	100	3.53153	7677.91	111.398	5.00598	0.0678621
	18:1/26:1	4721.31	100	7.25199	4165.04	88.2179	6.01779	0.22799
